# Supplementary material
Source: Springer Nature journal article supplement (https://www.springermedizin.de/resource/supplementary/12902_2012_205_MOESM1_ESM.pdf/9515666)

**a**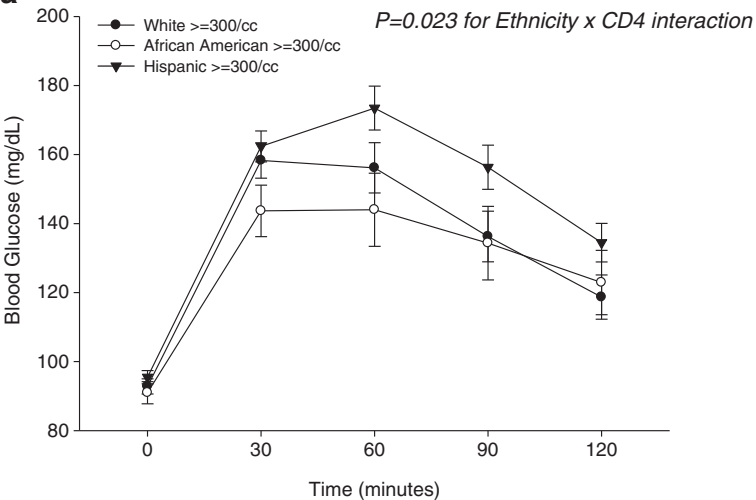**b**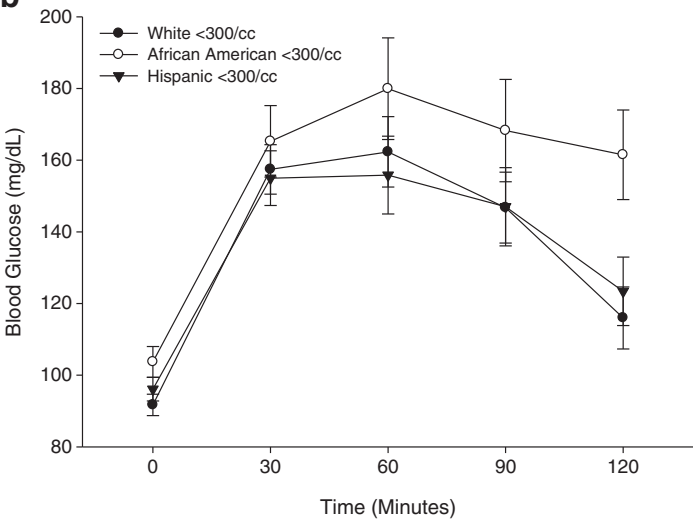

Supplement: MOESM1 [file 9515666]
